# Supplementary material for: Addition of a carbohydrate-binding module enhances cellulase penetration into cellulose substrates
Source: PubMed Central journal article supplement (PMC3716932; doi:10.1186/1754-6834-6-93), 2013-07-03
Supplement: 1754-6834-6-93-S1.pdf [file 1754-6834-6-93-S1.pdf]

## Additional File 1

# Addition of a carbohydrate-binding module enhances cellulase penetration into cellulose substrates

Vimalier Reyes-Ortiz<sup>1,2</sup>, Richard A Heins<sup>1,3</sup>, Gang Cheng<sup>1,3</sup>, Edward Y Kim<sup>5</sup>, Briana C Vernon<sup>1,4</sup>, Ryan B Elandt<sup>1</sup>, Paul D Adams<sup>1,2,6</sup>, Kenneth L Sale<sup>1,3</sup>, Masood Z Hadi<sup>1,3</sup>, Blake A Simmons<sup>1,3</sup>, Michael S Kent<sup>1,4</sup>, Danielle Tullman-Ercek<sup>1,2,5,6,\*</sup>

<sup>1</sup> Deconstruction Division, Joint BioEnergy Institute, Emeryville, CA 94608, US

<sup>2</sup> Department of Bioengineering, University of California, Berkeley, CA 94720, US

<sup>3</sup> Sandia National Laboratories, Livermore, CA 94550, US

<sup>4</sup> Sandia National Laboratories, Albuquerque, NM 87185, US

<sup>5</sup> Department of Chemical and Biomolecular Engineering, University of California, Berkeley, CA 94720, US

<sup>6</sup> Physical Biosciences Division, Lawrence Berkeley National Laboratory, Berkeley, CA 94720, US

\* Corresponding author. Physical Biosciences Division, Lawrence Berkeley National Laboratory, Berkeley, CA 94720, US

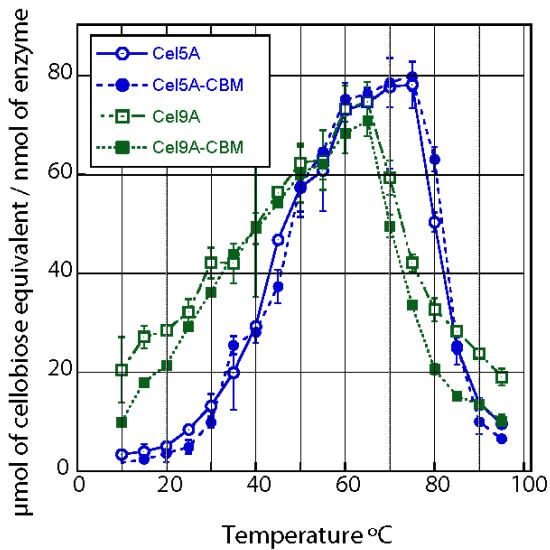

**Figure S1: Addition of the CBM does not affect the optimal temperature of the wild type catalytic domain.** Enzymatic activities of the wild type and chimeric cellulases on carboxymethyl cellulose (CMC) are shown as a function of temperature. Each cellulase was run at its optimal pH (4.8 and 5.5 for Cel5A and Cel9A, respectively).

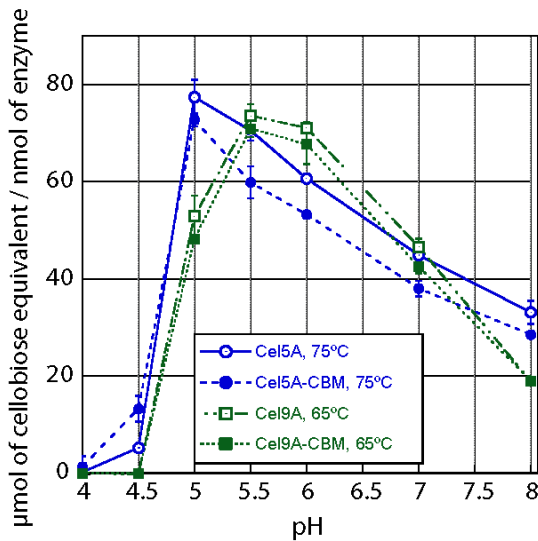

**Figure S2: Addition of the CBM does not affect the behavior of the catalytic domain at various pHs.** Enzymatic activities are shown for the wild type and chimeric cellulases on carboxymethyl cellulose (CMC) as a function of pH. Each cellulase was run at its optimal temperature (75°C and 65°C for Cel5A and Cel9A, respectively).

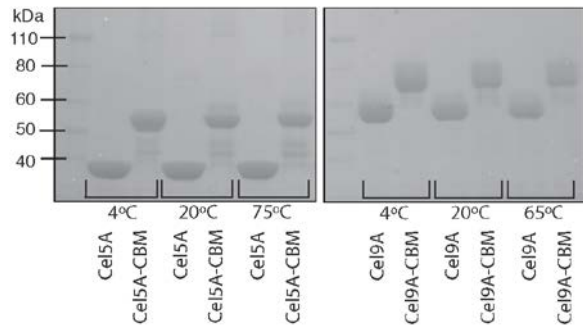

**Figure S3: The linker between the catalytic domain (CD) and the carbohydrate binding domain (CBM) is stable at high temperatures.** Stability of the linker was tested by splitting each of the chimeric enzyme samples into three aliquots, and then incubating all of the enzymes at their optimal temperatures ( $T_{opt}$ ), 4°C, or 20°C for 24 hrs. All samples were then run on a polyacrylamide gel, which was subsequently incubated with Coomassie stain.

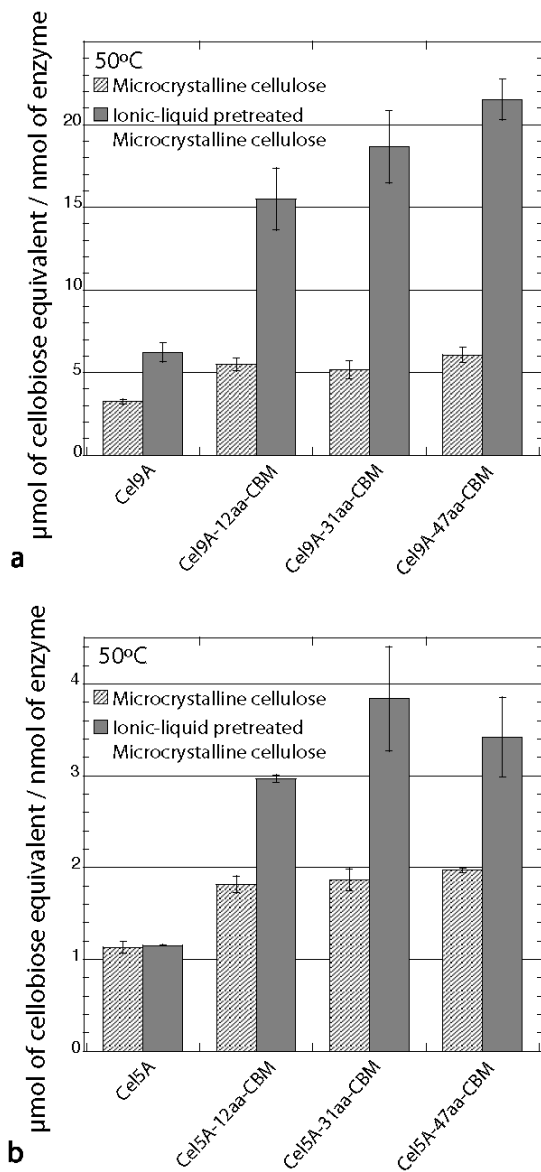

**Figure S4: Chimera linker length does not substantially affect hydrolysis of cellulosic substrates.** Two insoluble substrates, microcrystalline cellulose (MCC) and ionic liquid-pretreated MCC (IL-MCC), were used for this assay. a) Cel9A, Cel9A-12aa-CBM, Cel9A-31aa-CBM, and Cel9A-47aa-CBM; b) Cel5A, Cel5A-12aa-CBM, Cel5A-31aa-CBM, and Cel5A-47aa-CBM. Cellulases were loaded at 200 nM with either 50 mg/ml MCC or IL-MCC at 50°C for 24 h, and DNS assay was used to quantify reducing sugars with a cellobiose standard curve. The number of amino acids (aa) in each linker is denoted by “12aa”, “31aa” and “47aa”.

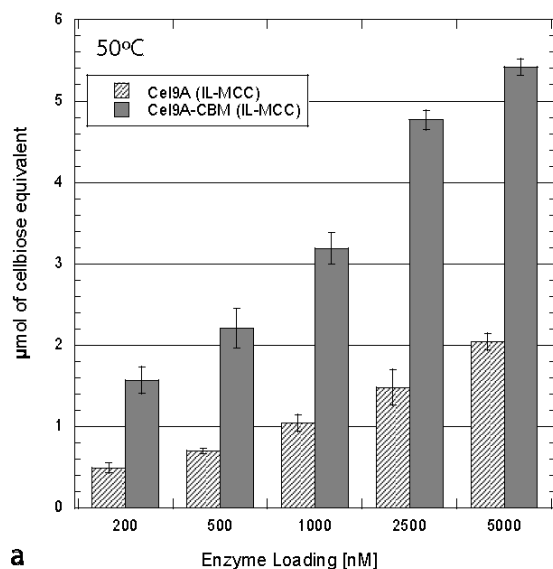

**a**

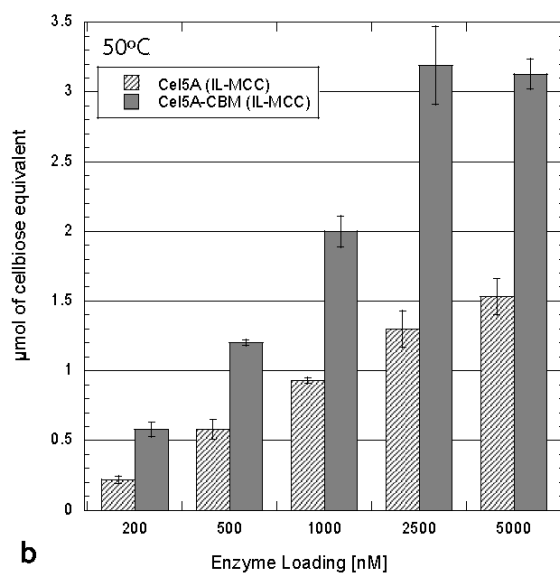

**b**

**Figure S5: The fold increase in activity of chimeric cellulases (CD-CBM) compared to the wild type cellulases (CD alone) is comparable over a wide range of enzyme concentration.** Ionic liquid-pretreated MCC (IL-MCC) was used for this assay. Enzyme loadings of 200 nM to 5000 nM were tested on samples with 50 mg/ml IL-MCC at 50°C for 24 h, and DNS assay was used to quantify reducing sugars with a cellobiose standard. Results are shown for Cel9A and Cel9A-CBM (a) and Cel5A and Cel5A-CBM (b).

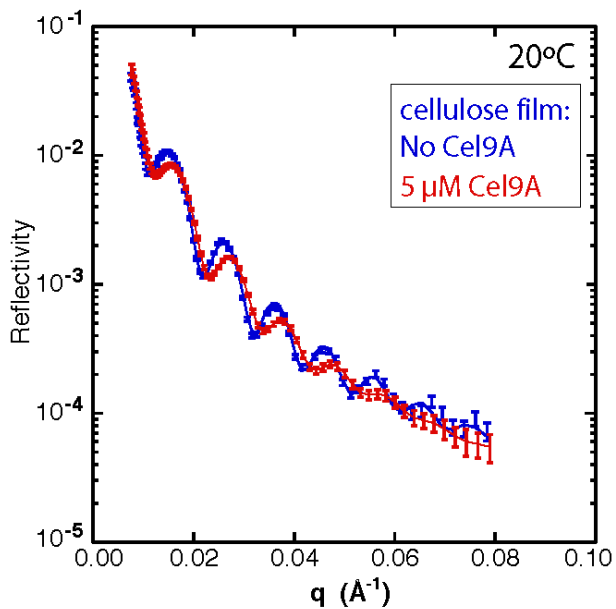

Figure S6: Neutron reflectivity data from cellulose films exposed to Cel9A at 20°C.

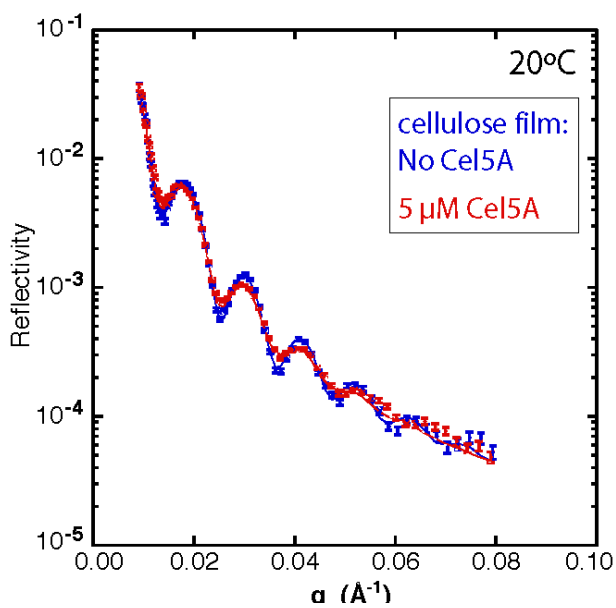

Figure S7: Neutron reflectivity data from cellulose films exposed to Cel5A at 20°C.

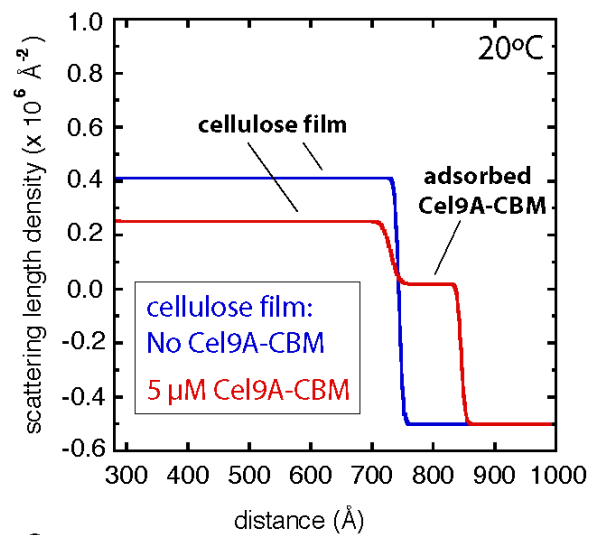

a

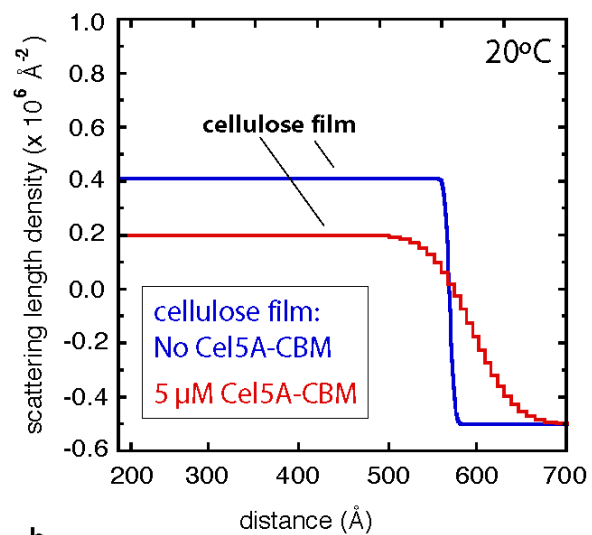

b

**Figure S8: Scattering length density (SLD) profiles with respect to distance for Cel9A-CBM (a) and Cel5A-CBM (b) at 20°C.** The SLD profile for Cel9A-CBM shows an additional layer at the film-solution interface that we attribute to adsorbed protein.

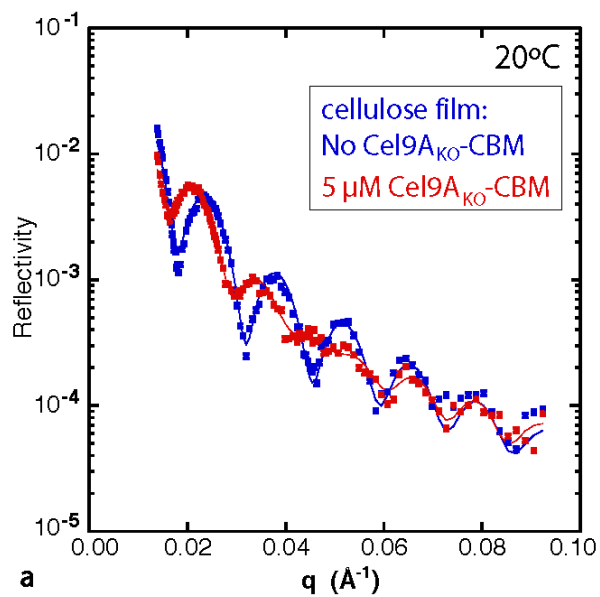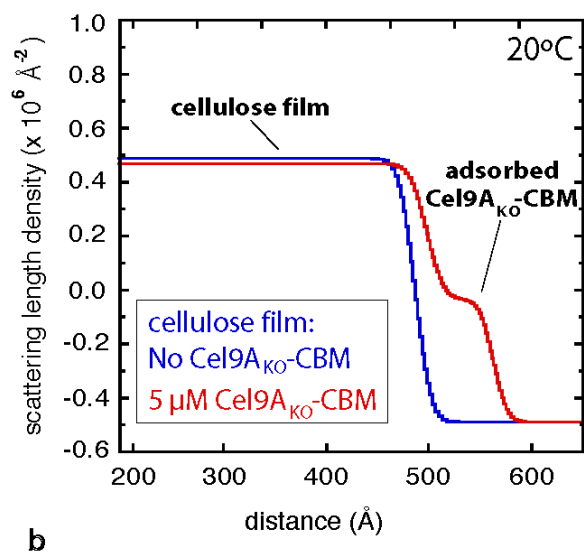

**Figure S9: Neutron reflectivity data (a) and SLD profiles (b) for a cellulose film before and after incubation with 5 μM Cel9A<sub>KO</sub>-CBM at 20°C. The SLD profile for Cel9A<sub>KO</sub>-CBM shows an additional layer at the film-solution interface that we attribute to adsorbed protein.**



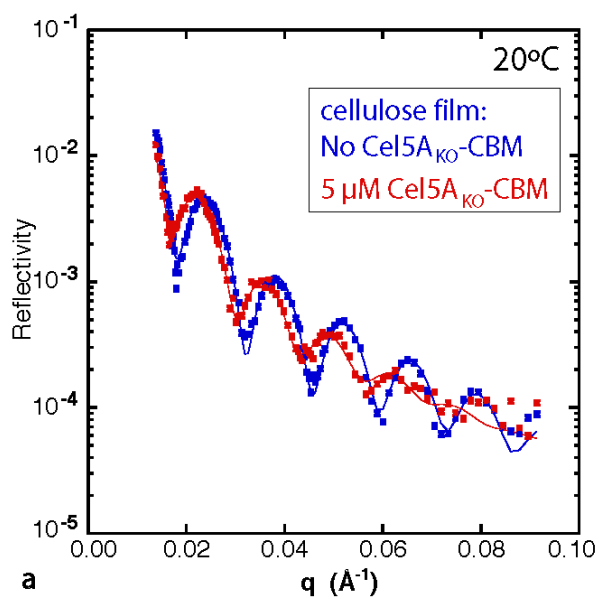

**a**

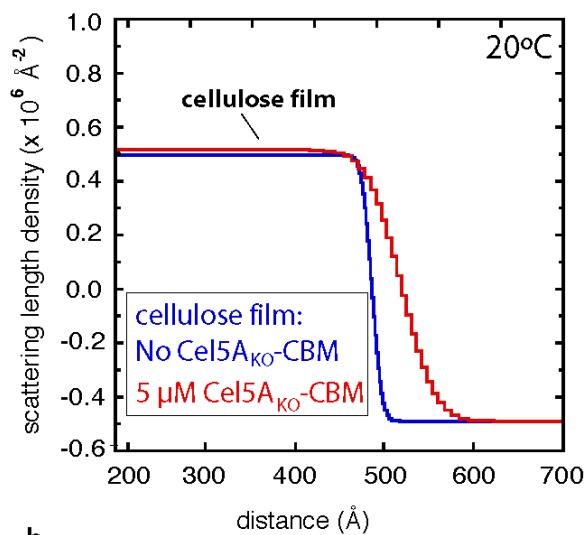

**b**

**Figure S10: Neutron reflectivity data (a) and SLD profiles (b) for a cellulose film before and after incubation with 5  $\mu\text{M}$  Cel5A<sub>KO</sub>-CBM at  $20^\circ\text{C}$ . The cellulose films are indicated.**

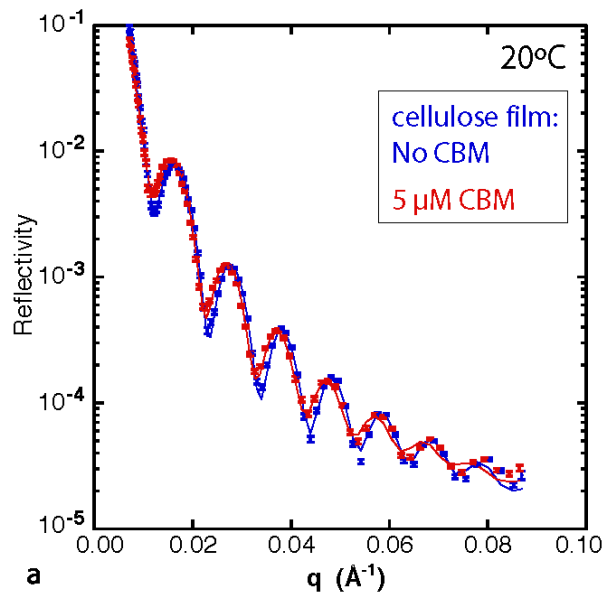

**a**

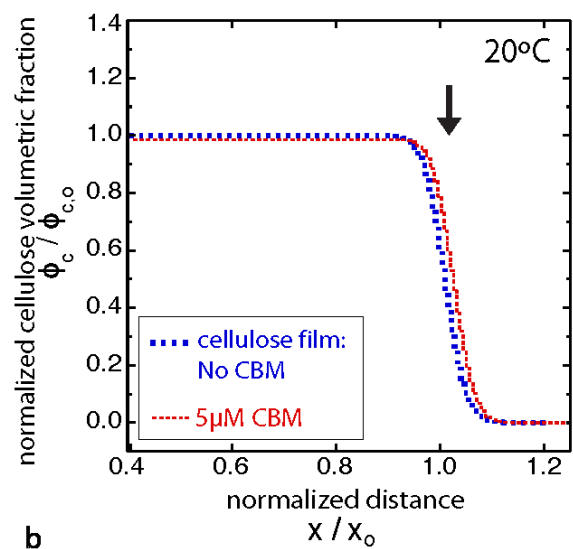

**b**

**Figure S11: Neutron reflectivity data (a) and normalized cellulose volume fraction profiles (b) for a cellulose film before and after incubation with the CBM at 5  $\mu$ M and 20°C.**

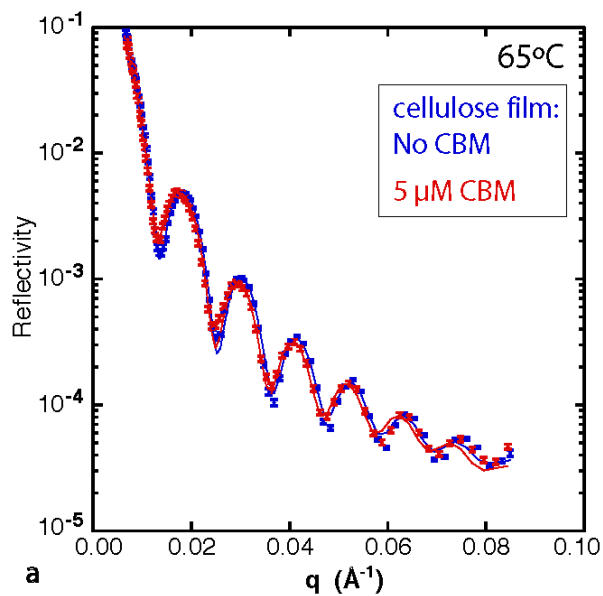

**a**

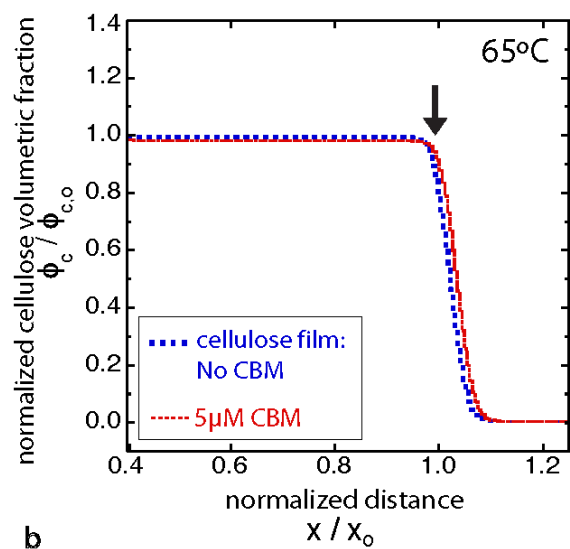

**b**

**Figure S12: Neutron reflectivity data (a) and normalized cellulose volume fraction profiles (b) for a cellulose film before and after incubation with the CBM at 5  $\mu$ M and 65°C.**

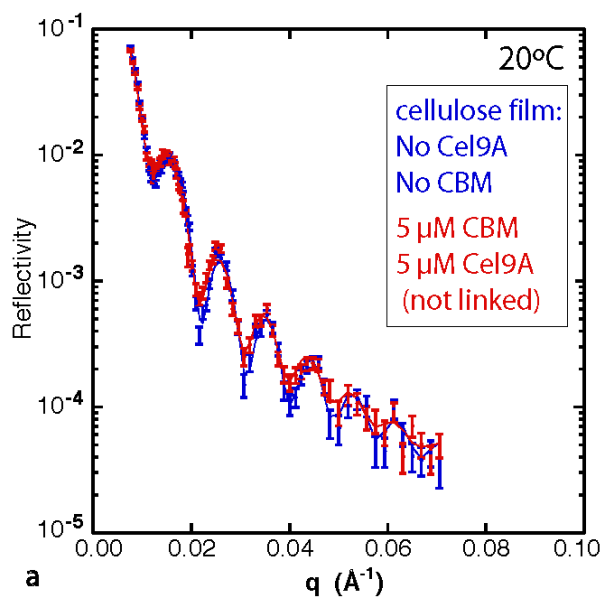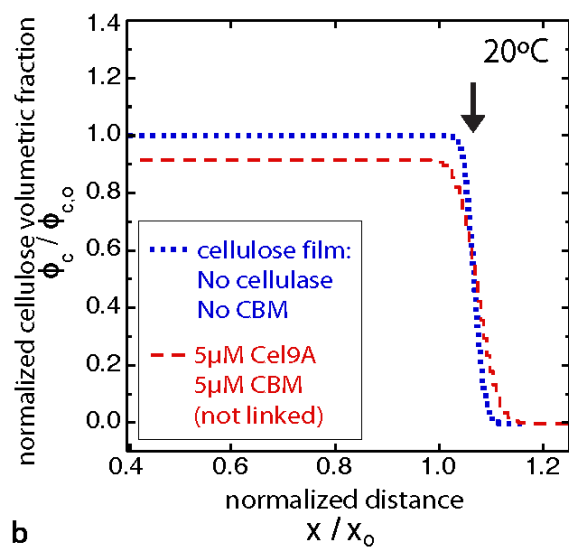

**Figure S13: Neutron reflectivity data (a) and normalized cellulose volume fraction profiles (b) for a cellulose film before and after incubation with a solution containing 5  $\mu$ M Cel9A and 5  $\mu$ M CBM at 20°C.**

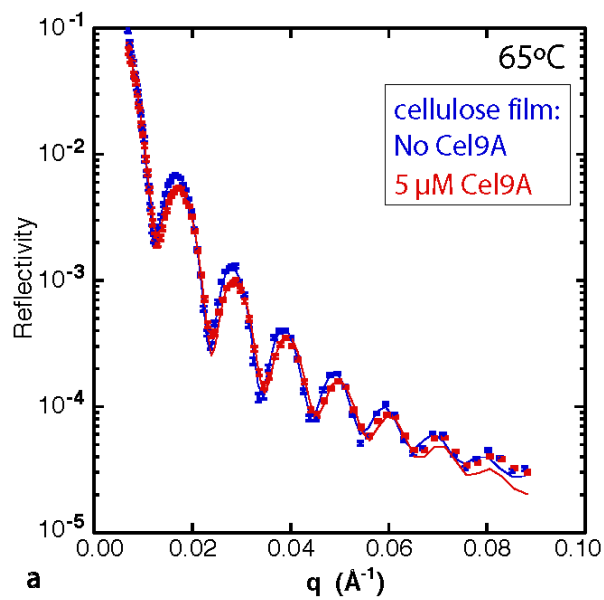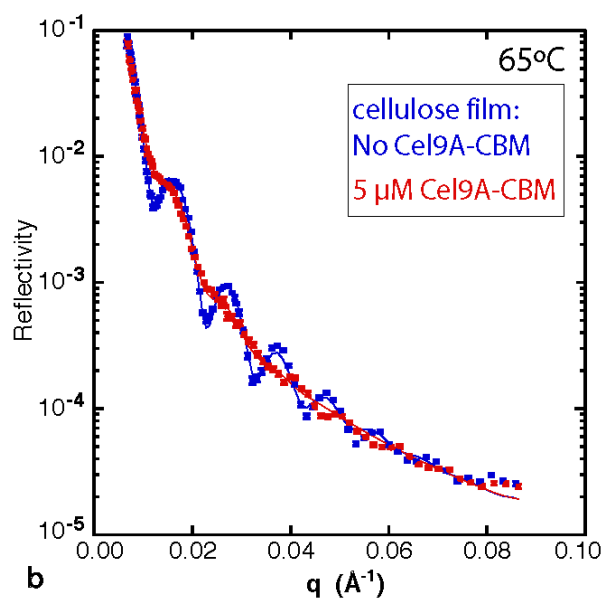

Figure S14: Neutron reflectivity data from cellulose films before and after incubation with a) 5  $\mu$ M Cel9A and b) 5  $\mu$ M Cel9A-CBM at 65°C.

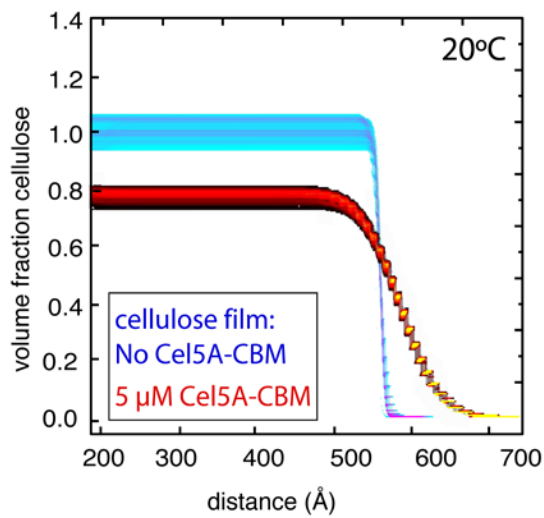

**Figure S15:** Plot showing volume fraction profiles with the uncertainty limits indicated as multicolored bands for Cel5A-CBM (yellow/red/black) and Cel5A (cyan/blue) at 20°C. The uncertainty bands shown in this plot are representative of the uncertainty in the SLD plots for each NR experiment performed in this study.
